# Supplementary material for: Impact of Maternal Micronutrient Intake on Gestational Diabetes Risk: Results from Greece’s BORN2020 Prospective Cohort Study
Source: MDPI journal article supplement (doi:10.3390/nu16091375), 2024-04-30

## Supplementary material

### Tables

**Table S1.** Micronutrient intakes and dietary reference values by the European Food and Safety Authorities (EFSA) for adult women >18 years old.

| EFSA<br>reference<br>values for<br>adult<br>women >18<br>years old |                        | Intake 6 months prior to pregnancy<br>(Period A) |                           |                  |                  |                               |                  | p<br>valu<br>e | Adjusted<br>odds<br>ratio |
|--------------------------------------------------------------------|------------------------|--------------------------------------------------|---------------------------|------------------|------------------|-------------------------------|------------------|----------------|---------------------------|
|                                                                    |                        | 25 <sup>th</sup>                                 | GDM (N=117)<br>media<br>n | 75 <sup>th</sup> | 25 <sup>th</sup> | Non GDM (N=680)<br>media<br>n | 75 <sup>th</sup> |                |                           |
| <b>Vitamins</b>                                                    |                        |                                                  |                           |                  |                  |                               |                  |                |                           |
| Biotin                                                             | AI 40<br>µg/day        | 15.21                                            | 20.51                     | 28.24            | 15.03            | 19.72                         | 26.04            | 1              | 0.99<br>(0.97,1.02)       |
| Cobalamin<br>(Vitamin<br>B12)                                      | AI 4 µg/day            | 2.6                                              | 3.31                      | 4.29             | 2.33             | 3.1                           | 3.99             | 0.83           | 1.01<br>(0.87,1.18)       |
| Folate                                                             | AR 250 µg<br>DFE/day   | 117.69                                           | 146.3                     | 186              | 120.3            | 143.7                         | 171.2            | 0.41           | 0.99<br>(0.99,1)          |
| Niacin                                                             | AR 1.3 mg<br>NE/MJ     | 14.45                                            | 17                        | 21.03            | 13.32            | 16.3                          | 19.3             | 0.69           | 1<br>(0.96,1.05)          |
| Pantotheni<br>c acid                                               | AI 5 mg/day            | 2.59                                             | 3.07                      | 3.9              | 2.49             | 2.98                          | 3.06             | 0.85           | 0.97<br>(0.75,1.24)       |
| Riboflavin<br>(Vitamin<br>B2)                                      | AR<br>1.3 mg/day       | 0.63                                             | 0.9                       | 1.12             | 0.62             | 0.82                          | 1.04             | 0.74           | 0.9<br>(0.48,1.56)        |
| Thiamin<br>(Vitamin<br>B1)                                         | AR<br>0.072<br>mg/MJ   | 0.42                                             | 0.5                       | 0.63             | 0.4              | 0.51                          | 0.61             | 0.29           | 0.47<br>(0.11,1.85)       |
| Vitamin A                                                          | AR<br>490 µg<br>RE/day | 627.67                                           | 811.08                    | 988.1            | 651.2            | 803.92                        | 964.74           | 0.33           | 0.99<br>(0.99,1)          |
| Vitamin B6                                                         | AR<br>1.3 mg/day       | 0.82                                             | 0.99                      | 1.18             | 0.83             | 0.99                          | 1.18             | 0.23           | 0.56<br>(0.22,1.41)       |
| Vitamin C                                                          | AR<br>80 mg/day        | 62.9                                             | 81.32                     | 100.9            | 67.7             | 83.07                         | 101.8            | 0.17           | 0.99<br>(0.98,1)          |

|                                    |                                           |         |         |         |         |         |         |      |                     |
|------------------------------------|-------------------------------------------|---------|---------|---------|---------|---------|---------|------|---------------------|
|                                    | AR* 115mg/day                             |         |         |         |         |         |         |      |                     |
| Vitamin D                          | AI<br>15 µg/day                           | 0.53    | 0.94    | 1.47    | 0.54    | 0.91    | 1.55    | 0.83 | 0.97<br>(0.76,1.21) |
| Vitamin E                          | AI<br>11 mg/day                           | 7.35    | 9.69    | 11.8    | 7.03    | 8.76    | 11.07   | 0.41 | 1.01<br>(0.96,1.06) |
| Vitamin K<br>as<br>phylloquin<br>e | AI<br>70 µg/day                           | 130.5   | 162.5   | 203.5   | 135.4   | 160.6   | 190     | 0.55 | 0.99<br>(0.99,1)    |
| <b>Minerals</b>                    |                                           |         |         |         |         |         |         |      |                     |
| Calcium                            | AR<br>750 mg/day                          | 546.12  | 770.6   | 918.5   | 533     | 702     | 906.6   | 0.55 | 0.99<br>(0.99,1)    |
| Copper                             | AI<br>1.3 mg/day                          | 1.28    | 1.64    | 1.96    | 1.33    | 1.56    | 1.86    | 1    | 0.99<br>(0.57,1.73) |
| Iodine                             | AI<br>150 µg/day                          | 77.7    | 96.9    | 112.7   | 76.7    | 93.1    | 114     | 0.36 | 0.99<br>(0.98,1)    |
| Iron                               | AR<br>7 mg/day                            | 5.87    | 6.9     | 8.15    | 5.76    | 6.78    | 8.02    | 0.98 | 1<br>(0.88,1.12)    |
| Magnesium                          | AI<br>300 mg/day                          | 164.3   | 194.1   | 233.2   | 160.7   | 187.3   | 222.5   | 0.96 | 1 (0.99,1)          |
| Manganese                          | AI<br>3 mg/day                            | 1.22    | 1.72    | 2.38    | 1.18    | 1.56    | 2.14    | 0.26 | 1.15<br>(0.89,1.49) |
| Phosphorus                         | AI<br>550 mg/day                          | 699.1   | 864.8   | 1040.9  | 645.6   | 804.2   | 980     | 0.97 | 0.99<br>(0.99,1)    |
| Potassium                          | AI<br>3500 mg/day                         | 1568.7  | 1781.8  | 2144.2  | 1499.3  | 1777.4  | 2110    | 0.57 | 0.99<br>(0.99,1)    |
| Sodium                             | Safe and<br>adequate<br>intake:<br>2g/day | 1540.3  | 2139    | 2548.8  | 1621.7  | 2001.8  | 2449.4  | 0.71 | 0.99<br>(0.99,1)    |
| Zinc                               | AI<br>6.2 mg/day                          | 7.48    | 8.82    | 10.2    | 6.95    | 8.15    | 9.56    | 0.57 | 1.02<br>(0.93,1.13) |
| <b>Water</b>                       | AI<br>2 L/day                             | 1956.18 | 2383.99 | 2972.78 | 1759.52 | 2295.97 | 2850.49 | 0.41 | 1 (0.99,1)          |
| <b>Alcohol</b>                     | -                                         | -       | 0.438   | 3.76    | -       | -       | 1.88    | 0.21 | 1.04<br>(0.96,1.11) |

The adjusted Odds Ratio (aOR) was computed using a logistic regression model. The adjustment was made with respect to: energy, supplements intake, ART, physical activity, BMI, maternal age, thyroid status, smoking status, and parity status. AR\*: AR vitamin C recommendations for smokers. “-“means not enough data or zero consumption reported. No safe limit for alcohol consumption has been established.

**Table S2.** Micronutrient intakes and dietary reference values by the European Food and Safety Authorities (EFSA) for pregnant women.

|                              | EFSA for pregnant women | Intake during the first half of pregnancy (Period B) |             |                  |                  |        |                  | p value | Adjusted odds ratio |
|------------------------------|-------------------------|------------------------------------------------------|-------------|------------------|------------------|--------|------------------|---------|---------------------|
|                              |                         | 25 <sup>th</sup>                                     | GDM (N=117) |                  | Non GDM (N=680)  |        |                  |         |                     |
|                              |                         |                                                      | median      | 75 <sup>th</sup> | 25 <sup>th</sup> | median | 75 <sup>th</sup> |         |                     |
| Vitamins                     |                         |                                                      |             |                  |                  |        |                  |         |                     |
| Biotin                       | AI<br>40 µg/day         | 16.47                                                | 24.13       | 30.2             | 15.4             | 19.5   | 25.5             | 0.002** | 1.03<br>(1.01,1.05) |
| Cobalamin<br>(Vitamin B12)   | AI<br>4.5 µg/day        | 2.6                                                  | 3.2         | 4.15             | 2.36             | 3.11   | 4                | 0.62    | 1.04<br>(0.88,1.23) |
| Folate                       | AI<br>600 µg DFE/day    | 125.8                                                | 159.1       | 200.4            | 119.8            | 146.03 | 176.3            | 0.007** | 1 (1,1.01)          |
| Niacin                       | AR<br>1.3 mg NE/MJ      | 13.7                                                 | 17.3        | 20.75            | 12.7             | 15.7   | 18.9             | 0.007** | 1.07<br>(1.01,1.13) |
| Pantothenic acid             | AI<br>5 mg/day          | 2.66                                                 | 3.21        | 3.99             | 2.49             | 3      | 3.63             | 0.007** | 1.42<br>(1.1,1.85)  |
| Riboflavin<br>(Vitamin B2)   | AR 1.5 mg/day           | 0.69                                                 | 0.89        | 1.12             | 0.61             | 0.79   | 1.02             | 0.13    | 1.63<br>(0.86,3.09) |
| Thiamin<br>(Vitamin B1)      | AR<br>0.072 mg/MJ       | 0.4                                                  | 0.5         | 0.63             | 0.4              | 0.5    | 0.6              | 0.28    | 2<br>(0.56,7.08)    |
| Vitamin A                    | AR<br>540 µg RE/day     | 707.4                                                | 826.5       | 1019.6           | 678.6            | 813.7  | 972.5            | 0.72    | 1 (0.99,1)          |
| Vitamin B6                   | AR<br>1.5 mg/day        | 0.81                                                 | 1.02        | 1.21             | 0.81             | 0.98   | 1.18             | 0.69    | 1.19<br>(0.48,2.88) |
| Vitamin C                    | AR<br>80 mg/day         | 68.6                                                 | 92.3        | 121.5            | 70               | 90.2   | 113.9            | 0.56    | 1 (0.99,1)          |
| Vitamin D                    | AI 15 µg/day            | 0.53                                                 | 0.85        | 1.46             | 0.51             | 0.87   | 1.43             | 0.54    | 1.05<br>(0.87,1.24) |
| Vitamin E                    | AI<br>11 mg/day         | 7.38                                                 | 9.34        | 12.3             | 7                | 8.8    | 11.4             | 0.16    | 1.04<br>(0.97,1.11) |
| Vitamin K as<br>phyllloquine | AI<br>70 µg/day         | 143                                                  | 172.7       | 210              | 136.6            | 162.9  | 192.5            | 0.1     | 1 (0.99,1)          |
| Minerals                     |                         |                                                      |             |                  |                  |        |                  |         |                     |
| Calcium                      | AR 750 mg/day           | 575                                                  | 805.8       | 916.2            | 539.3            | 717.7  | 911.8            | 0.59    | 1 (0.99,1)          |
| Copper                       | AI 1.5 mg/day           | 1.45                                                 | 1.77        | 1.96             | 1.37             | 1.65   | 1.95             | 0.48    | 1.22<br>(0.69,2.16) |
| Iodine                       | AI<br>200 µg/day        | 80.23                                                | 94.94       | 114.47           | 87.63            | 98.18  | 118.05           | 0.64    | 0.99<br>(0.99,1)    |
| Iron                         | AR 7 mg/day             | 5.64                                                 | 6.83        | 8.54             | 5.63             | 6.69   | 7.87             | 0.018*  | 1.19<br>(1.03,1.39) |
| Magnesium                    | AI 300 mg/day           | 164                                                  | 199.6       | 247.1            | 157.8            | 186.8  | 224              | 0.008** | 1 (1,1.01)          |

|                |                                          |        |        |        |        |        |        |         |                     |
|----------------|------------------------------------------|--------|--------|--------|--------|--------|--------|---------|---------------------|
| Manganese      | AI 3 mg/day                              | 1.29   | 1.72   | 2.52   | 1.19   | 1.55   | 2.17   | 0.005** | 1.4<br>(1.1,1.78)   |
| Phosphorus     | AI 550 mg/day                            | 733.8  | 871.8  | 1071.3 | 642.3  | 816.8  | 990.5  | 0.034*  | 1 (1,1)             |
| Potassium      | AI 3500 mg/day                           | 1474.7 | 1844.9 | 2230.9 | 1464.3 | 1745.4 | 2098.5 | 0.11    | 1 (0.99,1)          |
| Sodium         | Safe and<br>adequate intake:<br>2 gr/day | 1647   | 2058   | 2526   | 1660   | 2029.3 | 2481   | 0.54    | 1 (0.99,1)          |
| Zinc           | AR<br>7.5 mg/day                         | 7.76   | 8.98   | 10.23  | 7.13   | 8.31   | 9.72   | 0.012*  | 1.16<br>(1.03,1.31) |
| <b>Water</b>   | AI 2.3 L/day                             | 5      | 7.14   | 8      | 4      | 6      | 8      | 0.64    | 1 (0.99,1)          |
| <b>Alcohol</b> | -                                        | -      | -      | -      | -      | -      | -      | 0.21    | 1.2<br>(0.88,1.63)  |

The adjusted Odds Ratio (aOR) was computed using a logistic regression model. The adjustment was made with respect to: energy, ART, supplements intake, physical activity, BMI, maternal age, thyroid status, smoking status, and parity status; “-” means not enough data or zero consumption reported; “\*” indicates p value<0.05, “\*\*” indicates p value<0.01; AR\*: AR vitamin C recommendations for smokers. No safe limit for alcohol consumption has been established.

**Table S3.** Comparison of micronutrient intakes to EFSA guidelines for Period A (up to six months prior to gestation) and Period B (until first half of gestation).

|                            | Above EFSA<br>recommendation<br>for Period A | aOR (95% CI)                                         | p value | Above EFSA<br>recommendation<br>for Period B | aOR (95% CI)                                         | p value |
|----------------------------|----------------------------------------------|------------------------------------------------------|---------|----------------------------------------------|------------------------------------------------------|---------|
| <b>Vitamins</b>            |                                              |                                                      |         |                                              |                                                      |         |
| Biotin                     | AI >40 µg/day                                |                                                      |         | AI >40 µg/day                                | 1.33 (0.48,3.3)                                      | 0.55    |
| Cobalamin<br>(Vitamin B12) | AI >4 µg/day                                 | 1.06 (0.63,1.74)                                     | 0.81    | AI >4.5 µg/day                               | 1.16 (0.63,2.05)                                     | 0.16    |
| Folate                     | AR >250 µg DFE/day                           | 1.5 (0.49,4.12)                                      | 0.45    | AI >600 µg DFE/day                           | - (-,-)                                              | -       |
| Niacin                     | AR >1.3 mg NE/MJ                             | 8.97*10 <sup>5</sup><br>(2.37*10 <sup>-30</sup> , -) | 0.98    | AR >1.3 mg NE/MJ                             | 1.56*10 <sup>5</sup><br>(6.69*10 <sup>-43</sup> , -) | 0.98    |
| Pantothenic<br>acid        | AI >5 mg/day                                 | 0.85 (0.28,2.22)                                     | 0.76    | AI >5 mg/day                                 | 1.26 (0.41,3.47)                                     | 0.66    |
| Riboflavin<br>(Vitamin B2) | AR >1.3 mg/day                               | 0.98 (0.48,1.86)                                     | 0.96    | AR >1.5 mg/day                               | 0.76 (0.24,2.05)                                     | 0.62    |
| Thiamin<br>(Vitamin B1)    | AR >0.072 mg/MJ                              | 0.77 (0.49,1.2)                                      | 0.25    | AR >0.072 mg/MJ                              | 0.88 (0.57,1.38)                                     | 0.6     |
| Vitamin A                  | AR >490 µg RE/day                            | 0.77 (0.4,1.61)                                      | 0.47    | AR >540 µg RE/day                            | 0.76 (0.4,1.51)                                      | 0.42    |
| Vitamin B6                 | AR >1.3 mg/day                               | 0.8 (0.41,1.51)                                      | 0.52    | AR >1.5 mg/day                               | 1.25 (0.49,2.95)                                     | 0.61    |
| Vitamin C                  | AR >80 mg/day<br>AR* >115mg/day              | 0.83 (0.54,1.28)                                     | 0.41    | AR >80 mg/day                                | 0.93 (0.6,1.44)                                      | 0.75    |
| Vitamin D                  | AI >15 µg/day                                | - (-,-)                                              | -       | AI >15 µg/day                                | - (-,-)                                              | -       |
| Vitamin E                  | AI >11 mg/day                                | 1.17 (0.68,1.99)                                     | 0.56    | AI >11 mg/day                                | 1.46 (0.87,2.43)                                     | 0.15    |
| Vitamin K as<br>phyllouine | AI >70 µg/day                                | 6.21*10 <sup>5</sup><br>(5.98*10 <sup>-19</sup> , -) | 0.98    | AI >70 µg/day                                | 1.26 (0.21,24.28)                                    | 0.83    |
| <b>Minerals</b>            |                                              |                                                      |         |                                              |                                                      |         |
| Calcium                    | AR >750 mg/day                               | 1.26 (0.81,1.95)                                     | 0.3     | AR >750 mg/day                               | 1.38 (0.89,2.15)                                     | 0.15    |
| Copper                     | AI                                           | 0.61 (0.37,1.01)                                     | 0.054   | AI >1.5 mg/day                               | 1.19 (0.75,1.93)                                     | 0.45    |

|            |                    |                  |      |                   |                                                     |         |
|------------|--------------------|------------------|------|-------------------|-----------------------------------------------------|---------|
|            | >1.3 mg/day        |                  |      |                   |                                                     |         |
| Iodine     | AI<br>>150 µg/day  | 0.86 (0.3,2.12)  | 0.77 | AI<br>>200 µg/day | 5.82*10 <sup>-7</sup><br>(-,2.81*10 <sup>17</sup> ) | 0.98    |
| Iron       | AR<br>>7 mg/day    | 1.12 (0.69,1.8)  | 0.64 | AR >7 mg/day      | 1.12 (0.68,1.83)                                    | 0.65    |
| Magnesium  | AI<br>>300 mg/day  | 1.12 (0.33,3.29) | 0.83 | AI >300 mg/day    | 2.74 (0.95,7.51)                                    | 0.053   |
| Manganese  | AI<br>>3 mg/day    | 1.5 (0.76,2.83)  | 0.22 | AI >3 mg/day      | 2.52 (1.34,4.6)                                     | 0.003** |
| Phosphorus | AI<br>>550 mg/day  | 0.77 (0.41,1.48) | 0.42 | AI >550 mg/day    | 1.78 (0.83,4.28)                                    | 0.16    |
| Potassium  | AI<br>>3500 mg/day | 0.76 (0.03,6.73) | 0.84 | AI >3500 mg/day   | 1.43 (0.18,7.81)                                    | 0.69    |
| Sodium     | >2 gr/day          | 1.22 (0.77,1.93) | 0.38 | AR >2 gr/d        | 0.93 (0.59,1.47)                                    | 0.77    |
| Zinc       | AI<br>>6.2 mg/day  | 1.68 (0.86,3.56) | 0.15 | AR<br>>7.5 mg/day | 1.84 (1.09,3.19)                                    | 0.024*  |
| Water      | AI<br>>2 L/day     | 1.36 (0.87,2.18) | 0.18 | AI >2.3 L/day     | 1.36 (0.89,2.11)                                    | 0.16    |
| Alcohol    | -                  | -                | -    | -                 | -                                                   | -       |

The adjusted Odds Ratio (aOR) was computed using a logistic regression model. The adjustment was made with respect to: energy, ART, supplements intake, physical activity, BMI, maternal age, thyroid status, smoking status, and parity status; “-“ means not enough data or zero consumption reported; “\*” indicates p value<0.05, “\*\*\*” indicates p value <0.01; AR\*: AR vitamin C recommendations for smokers. No safe limit for alcohol consumption has been established.

**Table S4.** Intakes of micronutrients below 2SDs or above the Upper level (UL) as suggested by the European Food and Safety Authorities (EFSA) for adult non pregnant women.

| Micronutrients            | 6 months prior to pregnancy |            |         |                                                |                      |            |         |                                                |
|---------------------------|-----------------------------|------------|---------|------------------------------------------------|----------------------|------------|---------|------------------------------------------------|
|                           | Intakes below 2SDs          |            |         |                                                | Intakes above the UL |            |         |                                                |
|                           | GDM                         | Non GDM    | p value | aOR 95% CI                                     | GDM                  | Non GDM    | p value | aOR 95% CI                                     |
| <b>Vitamins</b>           |                             |            |         |                                                |                      |            |         |                                                |
| Biotin                    | -                           | 3 (0.44)   | 0.98    | $3.82 \times 10^{-6} (-, 3.73 \times 10^{22})$ | -                    | -          | -       | -                                              |
| Cobalamin (Vitamin B12)   | -                           | -          | -       | - (-,-)                                        | -                    | -          | -       | -                                              |
| Folate                    | 0 (0%)                      | 4 (0.588%) | 0.98    | $2.96 \times 10^{-6} (-, 9.4 \times 10^{36})$  | -                    | 1 (0.15)   | 0.98    | $8.44 \times 10^{-7} (-, 1.34 \times 10^{41})$ |
| Niacin                    | 0 (0%)                      | 2 (0.294%) | -       | $2.73 \times 10^{-6} (-, 8.15 \times 10^{36})$ | -                    | -          | -       | -                                              |
| Pantothenic acid          | -                           | 4 (0.59)   | 0.98    | $1.3 \times 10^{-6} (-, 2.87 \times 10^{29})$  | -                    | -          | -       | -                                              |
| Riboflavin (Vitamin B2)   | -                           | -          | -       | - (-,-)                                        | --                   | -          | -       | -                                              |
| Thiamin (Vitamin B1)      | 0 (0%)                      | 2 (0.294%) | 1       | $2.96 \times 10^{-6} (-, 9.4 \times 10^{36})$  | -                    | -          | -       | -                                              |
| Vitamin A                 | 2 (1.71%)                   | 9 (1.32%)  | 0.39    | 2.04 (0.29, 8.82)                              | -                    | (0.15)     | 0.98    | $1.78 \times 10^{-5} (-, 4.16 \times 10^{42})$ |
| Vitamin B6                | -                           | 3 (0.44)   | 0.98    | $2.77 \times 10^{-6} (-, 1.82 \times 10^{23})$ | -                    | -          | -       | - (-,-)                                        |
| Vitamin C                 | 2 (1.7)                     | 4 (0.59)   | 0.15    | 3.77 (0.48, 21.86)                             | -                    | -          | -       | -                                              |
| Vitamin D                 | 117(100 %)                  | 680 (100%) | -       | - (-,-)                                        | -                    | -          | -       | - (-,-)                                        |
| Vitamin E                 | -                           | -          | -       | - (-,-)                                        | -                    | -          | -       | - (-,-)                                        |
| Vitamin K as phyloquinone | 0 (0%)                      | 6 (0.882%) | 0.98    | $1.61 \times 10^{-6} (-, 1.67 \times 10^{18})$ | -                    | -          | -       | -                                              |
| <b>Minerals</b>           |                             |            |         |                                                |                      |            |         |                                                |
| Calcium                   | -                           | -          | -       | - (-,-)                                        | -                    | 3 (0.44)   | 0.98    | $2.26 \times 10^{-6} (-, 6.81 \times 10^{22})$ |
| Copper                    | 1 (0.85)                    | 8 (1.18)   | 0.83    | 0.78 (0.04, 4.74)                              | -                    | -          | -       | -                                              |
| Iodine                    | -                           | 7 (1.03)   | 0.98    | $1.38 \times 10^{-6} (-, 1.46 \times 10^{15})$ | -                    | -          | -       | - (-,-)                                        |
| Iron                      | -                           | 1 (0.15)   | 0.98    | $7.98 \times 10^{-6} (-, 1.91 \times 10^{42})$ | -                    | -          | -       | -                                              |
| Magnesium                 | -                           | 3 (0.44)   | 0.98    | $2.77 \times 10^{-6} (-, 1.82 \times 10^{23})$ | 21 (17.9)            | 90 (13.24) | 0.52    | 1.22 (0.64, 2.26)                              |
| Manganese                 | -                           | -          | -       | - (-,-)                                        | -                    | -          | -       | -                                              |
| Phosphorus                | -                           | 2 (0.3)    | 0.98    | $2.73 \times 10^{-6} (-, 8.15 \times 10^{36})$ | -                    | -          | -       | -                                              |
| Potassium                 | -                           | 3 (0.44)   | 0.98    | $2.77 \times 10^{-6} (-, 1.82 \times 10^{23})$ | -                    | -          | -       | -                                              |

|                |   |          |      |                                                   |   |          |      |                                                   |
|----------------|---|----------|------|---------------------------------------------------|---|----------|------|---------------------------------------------------|
| Sodium         | - | 7 (1.03) | 0.98 | $1.48 \times 10^{-6}$ (-, $9.98 \times 10^{14}$ ) | - | -        | -    | -                                                 |
| Zinc           | - | 2 (0.3)  | 0.98 | $2.73 \times 10^{-6}$ (-, $8.15 \times 10^{36}$ ) | - | 1 (0.15) | 0.98 | $8.44 \times 10^{-7}$ (-, $1.34 \times 10^{41}$ ) |
| <b>Water</b>   |   |          | 0.98 | $2.73 \times 10^{-6}$ (-, $1.5 \times 10^{23}$ )  | - | -        | -    | -                                                 |
| <b>Alcohol</b> | - | -        | -    | - (-,-)                                           | - | -        | -    | -                                                 |

“-“ means there were not enough data to draw conclusions

Table S5. Intakes of micronutrients below 2SDs or above the Upper level (UL) as suggested by the European Food and Safety Authorities (EFSA) for pregnant women, during pregnancy.

| Micronutrients           | Until first half of gestation |              |         |                                                   |                      |           |         |                   |
|--------------------------|-------------------------------|--------------|---------|---------------------------------------------------|----------------------|-----------|---------|-------------------|
|                          | Intakes below 2SDs            |              |         |                                                   | Intakes above the UL |           |         |                   |
|                          | GDM (N%)                      | Non GDM (N%) | p value | aOR 95% CI                                        | GDM                  | Non GDM   | p value | aOR 95% CI        |
| <b>Vitamins</b>          |                               |              |         |                                                   |                      |           |         |                   |
| Biotin                   | -                             | 1 (0.15)     | 0.98    | $9.96 \times 10^{-6}$ (-, $2.23 \times 10^{42}$ ) | -                    | -         | -       | -                 |
| Cobalamin (Vitamin B12)  | 1 (0.85)                      | 3 (0.44)     | 0.41    | 2.69 (0.12,22.8)                                  | -                    | -         | -       | -                 |
| Folate                   | 1 (0.85)                      | 7 (1.03)     | 0.89    | 0.86 (0.04,5.41)                                  | -                    | -         | -       | - (-,-)           |
| Niacin                   |                               |              | 0.2     | 6.46 (0.24,174.97)                                | -                    | -         | -       | -                 |
| Pantothenic acid         | 1 (0.85)                      | 4 (0.59)     | 0.71    | 1.53 (0.07,11.26)                                 | -                    | -         | -       | -                 |
| Riboflavin (Vitamin B2)  | 1 (0.855%)                    | 2 (0.294%)   | 0.3     | 3.76 (0.16,42.66)                                 | -                    | -         | -       | -                 |
| Thiamin (Vitamin B1)     | 1 (0.855%)                    | 1 (0.147%)   | 0.2     | 6.46 (0.24,174.97)                                | -                    | -         | -       | -                 |
| Vitamin A                | 2 (1.71%)                     | 16 (2.35%)   | 0.75    | 0.78 (0.12,2.93)                                  | -                    | -         | -       | - (-,-)           |
| Vitamin B6               | 1 (0.85)                      | 3 (0.44)     | 0.61    | 1.83 (0.08,15.42)                                 | -                    | -         | -       | - (-,-)           |
| Vitamin C                | -                             | 4 (0.59)     | 0.98    | $9.46 \times 10^{-7}$ (-, $9.35 \times 10^{29}$ ) | -                    | -         | -       | -                 |
| Vitamin D                | 117 (100%)                    | 680 (100%)   | -       | - (-,-)                                           | -                    | -         | -       | - (-,-)           |
| Vitamin E                |                               |              | 0.98    | $3.04 \times 10^{-6}$ (-, $7.52 \times 10^{36}$ ) | -                    | -         | -       | - (-,-)           |
| Vitamin K as phylloquine | 1 (0.855%)                    | 9 (1.32%)    | 0.71    | 0.67 (0.03,3.82)                                  | -                    | -         | -       | -                 |
| <b>Minerals</b>          |                               |              |         |                                                   |                      |           |         |                   |
| Calcium                  | 1 (0.85)                      | 1 (0.15)     | 0.2     | 6.46 (0.24,174.97)                                | 1 (0.85)             | 1 (0.15)  | 0.5     | 2.72 (0.09,75.29) |
| Copper                   | 1 (0.85)                      | 8 (1.18)     | 0.81    | 0.76 (0.04,4.51)                                  | -                    | -         | -       | -                 |
| Iodine                   | 2 (1.7)                       | 7 (1.03)     | 0.44    | 1.91 (0.27,8.56)                                  | -                    | -         | -       | - (-,-)           |
| Iron                     | 2 (1.7)                       | 4 (0.59)     | 0.3     | 2.62 (0.33,15.07)                                 | -                    | -         | -       | -                 |
| Magnesium                | 1 (0.85)                      | 4 (0.59)     | 0.75    | 1.43 (0.07,10.53)                                 | 26 (22.2)            | 88 (12.9) | 0.066   | 1.71 (0.95,3)     |
| Manganese                | -                             | -            | -       | - (-,-)                                           | -                    | -         | -       | -                 |

|                |               |            |      |                   |   |   |   |         |
|----------------|---------------|------------|------|-------------------|---|---|---|---------|
| Phosphorus     | 2 (1.7)       | 5 (0.74)   | 0.3  | 2.47 (0.33,12.54) | - | - | - | -       |
| Potassium      | 1 (0.85)      | 5 (0.74)   | 0.8  | 1.34 (0.06,9.32)  | - | - | - | -       |
| Sodium         | 1 (0.85)      | 5 (0.74)   | 0.98 | 0.96 (0.04,6.63)  | - | - | - | -       |
| Zinc           | 1<br>(0.855%) | 6 (0.882%) | 0.9  | 1.14 (0.05,7.37)  | - | - | - | - (-,-) |
| <b>Water</b>   | 2 (1.71%)     | 6 (0.882%) | -0.5 | 1.76 (0.24,8.14)  | - | - | - | -       |
| <b>Alcohol</b> | -             | -          | -    | - (-,-)           | - | - | - | -       |

“-“ means there were not enough data to draw conclusions

**Table S6.** Adherence to MDS and risk for GDM before and during pregnancy for the Mean adequacy ratio (MAR).

| <b>Adherence to Mediterranean Diet (Score)</b> |               |                  |                  |                  |
|------------------------------------------------|---------------|------------------|------------------|------------------|
|                                                |               | LOW<br>(0-5)     |                  | High<br>(6-9)    |
| <b>Before pregnancy</b>                        | p-value (aOR) | aOR (95% CI)     | p-value<br>(aOR) | aOR (95% CI)     |
| MAR                                            | 0.84          | 0.99 (0.98,1.01) | 0.75             | 0.99 (0.98,1.01) |
| MAR reduced                                    | 0.74          | 0.91 (0.54,1.52) | 0.75             | 0.89 (0.44,1.74) |
| <b>During pregnancy</b>                        |               |                  |                  |                  |
| MAR                                            | 0.61          | 0.99 (0.97,1.01) | 0.23             | 1.01 (0.99,1.03) |
| MAR reduced                                    | 0.68          | 0.83 (0.33,1.95) | 0.29             | 1.66 (0.63,4.35) |

MDS: Mediterranean diet score; GDM: gestational diabetes mellitus; MAR: mean adequacy ratio; MDS scoring scale by Trichopoulou et al. The adjusted Odds Ratio (aOR) was computed using a logistic regression model. The adjustment was made with respect to: energy, ART, supplements intake, physical activity, BMI, maternal age, thyroid status, smoking status, and parity status.

Figures

**Figure S1.** Vitamin intakes above EFSA recommendations in GDM and non-GDM groups for up to six months before pregnancy.

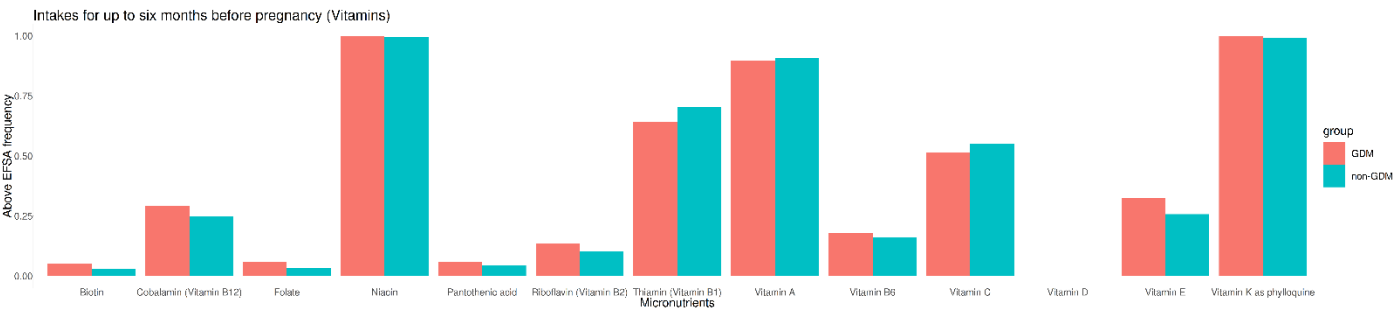

**Figure S2.** Mineral and water intakes above EFSA recommendations in GDM and non-GDM groups for up to six months before pregnancy.

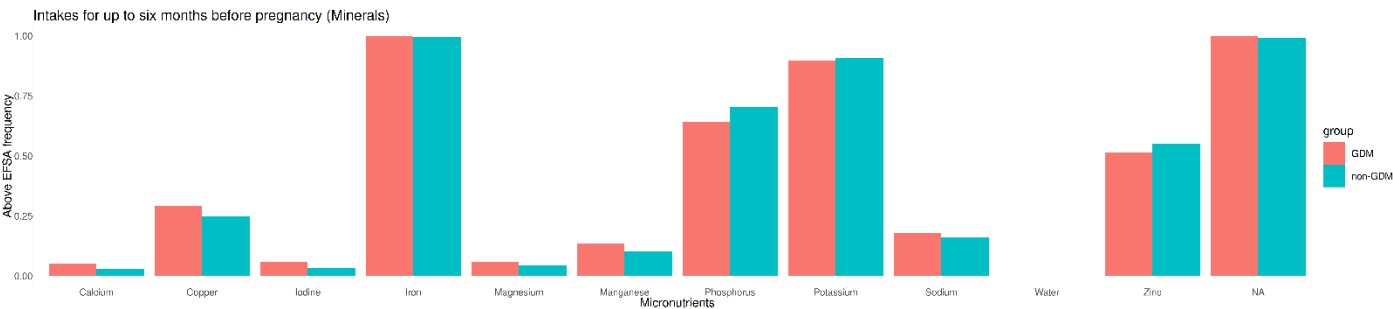

**Figure S3.** Vitamin intakes above EFSA recommendations in GDM and non-GDM groups during pregnancy.

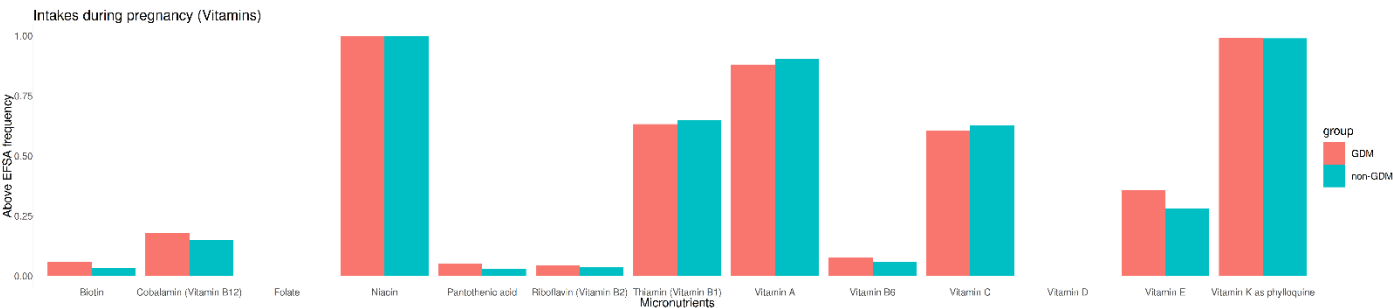

**Figure S4.** Mineral and water intakes above EFSA recommendations in GDM and non-GDM groups during pregnancy.

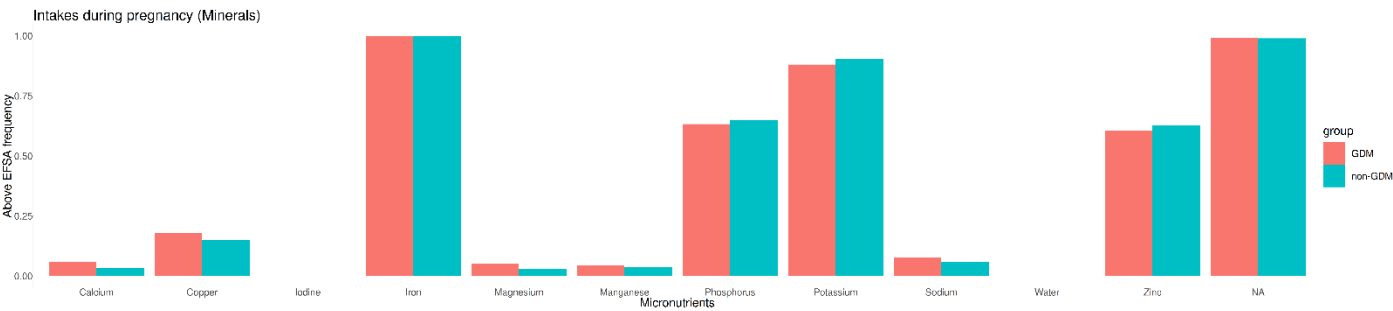

Supplement: s1 [file s1]
